# Supplementary material for: Cranial Remain from Tunisia Provides New Clues for the Origin and Evolution of Sirenia (Mammalia, Afrotheria) in Africa
Source: PLoS One. 2013 Jan 16;8(1):e54307. doi: 10.1371/journal.pone.0054307 (PMC3546994; doi:10.1371/journal.pone.0054307)
Supplement: Information S4 — Character matrix for the cladistic analysis (nexus format). (NEX) [file pone.0054307.s004.nex]

#NEXUS

[ File saved by NDE version 0.5.0, Wed Nov 14 15:40:26 2012 ]

BEGIN TAXA;
	DIMENSIONS NTAX=22;
	TAXLABELS
		Kulbeckia
		Phenacodus
		Meniscotherium
		Hyopsodus
		Pleuraspidotherium
		Arctocyon
		Orycteropus
		Megalohyrax
		Procavia
		Arsinoitherium
		Phosphatherium
		Numidotherium
		Moeritherium
		Elephantoidea
		'Chambi sirenian'
		Prorastomus
		Eosiren
		Eotheroides
		'Protosirenidae n.gen. n.sp.'
		Protosiren
		Dugong
		Trichechus
		;
ENDBLOCK;

BEGIN CHARACTERS;
	DIMENSIONS NCHAR=27;
	FORMAT DATATYPE=STANDARD MISSING=? GAP=- SYMBOLS="012";
	CHARLABELS
		[1] 'Morphology of the bulla (Benoit et al., 2012)'
		[2] 'Morphology of the external auditory meatus (Court, 1990)'
		[3] 'Pachysteosclerosis of the pars petrosa and the tegmen tympani'
		[4] 'Merging of the fenestra cochlea and the canaliculus cochleae (Court , 1990)'
		[5] 'Shape of the fenestra vestibuli'
		[6] 'Stylomastoid foramen'
		[7] 'Hiatus fallopi'
		[8] 'Transpromontorial sulcus'
		[9] 'Stapedial sulcus or evidence for a stapedial artery'
		[10] 'Stapedial muscle fossa'
		[11] 'Shape of the tegmen tympani'
		[12] 'Tegmen process'
		[13] 'Epitympanic recess'
		[14] 'Commissura suprafacialis (Sagne, 2001)'
		[15] 'Pseudotympanic foramen'
		[16] 'Epitympanic wing'
		[17] 'Mastoid apophysis (Novacek and Wyss, 1986)'
		[18] 'Processus fonticulus'
		[19] 'Pachyosteosclerosis of the mastoid apophysis'
		[20] 'Crista falciformis'
		[21] 'Subarcuate fossa'
		[22] 'Shape of the cochlear spiral'
		[23] 'Volume of the cochlear canal with respect to that of the bony vestibule'
		[24] 'Secondary common crus'
		[25] 'Semicircular canals size'
		[26] 'Radius of the lateral canal'
		[27] 'Shape of the cross-section of the anterior and posterior semicircular canal'
		;
	STATELABELS
		1
			'ring-like ectotympanic'
			'ossified ectotympanic bulla '
			'ossified petrosal bulla',
		2
			'ventrally opened'
			'enclosed within the squamosal',
		3
			absent
			present,
		4
			absent
			present,
		5
			'oval, stapedial ratio nearly equaling or exceeding 1.7'
			'rounded, stapedial ratio equaling or being inferior to 1.6',
		6
			'opened ventrally, forms a simple notch on the petrosal '
			'ventrally bridged by the caudal tympanic process and the tympanohyal process, forms a distinct foramen on the petrosal ',
		7
			'absent, with a fallopian notch instead'
			present,
		8
			absent
			present,
		9
			absent
			present,
		10
			'distinctly round or oval fossa on the ventral aspect of the petrosal'
			'unclear boundaries of the fossa',
		11
			undifferenciated
			reniform,
		12
			'absent '
			'present ',
		13
			small
			'large and deeply excavating the epitympanic recess',
		14
			thick
			'thin or absent',
		15
			absent
			present,
		16
			absent
			present,
		17
			develloped
			'reduced or absent'
			'squared mastoid apophysis ',
		18
			absent
			present,
		19
			'absent, the mastoid being filled with cancellous cells'
			present,
		20
			thin
			'thick, widely separating the acoustic foramina',
		21
			'absent or reduced'
			Deep,
		22
			'planispiral, cochlear aspect ratio not exceeding 0.65'
			'conical, cochlear aspect ratio nearly equals or exceeds 0.70',
		23
			smaller
			'as large or larger',
		24
			absent
			present,
		25
			unequal
			'roughly similar',
		26
			'the lateral canal is smaller than the anterior and/or the posterior canal'
			'the lateral canal is larger than the anterior and the posterior canal',
		27
			flatened
			circular,
	;
	MATRIX
		Kulbeckia                        ?0?0001010 0000010-00 1001001
		Phenacodus                       ?0?0?11110 0000000-0? ???????
		Meniscotherium                   ?0?0001110 0000000-0? ???????
		Hyopsodus                        ?000101110 0000000-00 1101001
		Pleuraspidotherium               ?0?0011110 0000010-01 11?????
		Arctocyon                        ?0?0011110 0000000-01 1??1???
		Orycteropus                      0000111110 0000010-01 1011001
		Megalohyrax                      (12)0?????0?? ??????1-?? ???????
		Procavia                         2000011000 0000011-00 0100000
		Arsinoitherium                   ?(01)01100000 0100101-00 0000000
		Phosphatherium                   ?0?0?11000 0000001-?0 0??????
		Numidotherium                    110000010? 0100101-00 00?10??
		Moeritherium                     ?10110?00? 01???01-00 01?????
		Elephantoidea                    1101(01)01000 0100(01)11-00 0000000
		'Chambi sirenian'                ??1?001000 1000001-00 ?111111
		Prorastomus                      0010100000 1100102010 0010111
		Eosiren                          00?1?0000? 1010?121?1 0??????
		Eotheroides                      00?1?0?001 101??120?1 0??????
		'Protosirenidae n.gen. n.sp.'    ???1?0000? 10?1-120?1 0??????
		Protosiren                       00?1?00001 1011-12(01)?1 0??????
		Dugong                           0011?00001 1010112011 00?0101
		Trichechus                       0011100001 1011-12011 0010111
	;
ENDBLOCK;

BEGIN ASSUMPTIONS;
	OPTIONS DEFTYPE=UNORD POLYTCOUNT=MINSTEPS;
ENDBLOCK;

BEGIN NOTES;
	[Taxon comments]

	[Character comments]

	[Character state comments]
	TEXT CHARACTER=17 STATE=2 TEXT='Following Novacek and Wyss (1986) this character was coded as a new state in sirenian, in order to reflect the uniqueness of their morphology and to minimize phylogenetic hypotheses.';

	[Attribute comments]

	[Taxon pictures]

	[Character pictures]

	[Character state pictures]

	[Attribute pictures]
ENDBLOCK;


BEGIN PAUP;


OUTGROUP Kulbeckia ;
SET CRITERION = PARSIMONY;

HSEARCH
NREPS=1000
ADDSEQ=RANDOM;

[jackknife pctdelete=50 nreps=500 conlevel=50 treefile=[the elected name4] keepall=yes cutoffpct=50 grpfreq=yes /start=stepwise addseq=random nreps=1000 savereps=yes nchuck=2 chuckscore=5 dstatus=none;
set root=outgroup;]
[bootstrap nreps=100;]
CONTREE/MAJRULE = YES ;
savetrees file=Chambi.tre format=nexus;
contre all/treefile=Chambicontree.tre;
PSET MSTAXA = POLYMORPH;
                


ENDBLOCK;
